# Supplementary material for: Gene expression and epigenetics reveal species-specific mechanisms acting upon common molecular pathways in the evolution of task division in bees
Source: PubMed Central journal article supplement (PMC7878513; doi:10.1038/s41598-020-75432-8), 2021-02-11
Supplement: 41598_2020_75432_MOESM1_ESM.pdf [file 41598_2020_75432_MOESM1_ESM.pdf]

# **Gene expression and epigenetics reveal species-specific mechanisms acting upon common molecular pathways in the evolution of task division in bees**

Natalia de Souza Araujo<sup>1,2</sup> and Maria Cristina Arias<sup>1</sup>

<sup>1</sup> Department of Genetics and Evolutionary Biology, Universidade de São Paulo. Rua do Matão, 277, 05508-090 São Paulo - SP, Brazil

<sup>2</sup> [current address] Interuniversity Institute of Bioinformatics in Brussels and Department of Evolutionary Biology & Ecology, Université Libre de Bruxelles. Avenue F.D. Roosevelt, 50. B-1050 Brussels, Belgium

## S1 - Supplementary File 1

### Supplementary Tables

**Table SI** Main quality parameters from the complete transcriptome assembly of superTranscripts from *T. angustula* and *B. terrestris* workers. Annotated superTranscripts refer to superTranscripts with at least one significant blast hit against the UniRef90 database (e-value <1e-5).

|                                  | <i>T. angustula</i>                          | <i>B. terrestris</i>                         |
|----------------------------------|----------------------------------------------|----------------------------------------------|
| Total Number of superTranscripts | 33,065                                       | 27,987                                       |
| N50                              | 3,614                                        | 5,490                                        |
| %GC                              | 38.11                                        | 37.19                                        |
| Mean coverage per sample         | ≅100x                                        | ≅130x                                        |
| Annotated superTranscripts       | 26,623                                       | 21,638                                       |
| Number of lncRNA                 | 347                                          | 431                                          |
| BUSCO stats (n: 4,415)           | C:86.2% [S:49.2%, D:37.0%]<br>F:7.9%, M:5.9% | C:91.9% [S:47.5%, D:44.4%]<br>F:3.9%, M:4.2% |

**Table SII** Complete list of Gene Ontology terms of Biological processes enriched among the differentially expressed genes in *A. mellifera* body parts, *B. terrestris* and *T. angustula*. Significance was obtained using Fisher's exact enrichment test (p <0.01).

|            |                                                     | <i>B. terrestris</i> |             |          |          |
|------------|-----------------------------------------------------|----------------------|-------------|----------|----------|
| GO ID      | GO Term                                             | Annotated            | Significant | Expected | p-value  |
| GO:0006313 | transposition, DNA-mediated                         | 29                   | 5           | 1.09     | 0.0039   |
| GO:0032196 | transposition                                       | 29                   | 5           | 1.09     | 0.0039   |
| GO:0015074 | DNA integration                                     | 139                  | 12          | 5.23     | 0.0049   |
| GO:0006310 | DNA recombination                                   | 31                   | 5           | 1.17     | 0.0053   |
| GO:0001522 | pseudouridine synthesis                             | 4                    | 2           | 0.15     | 0.008    |
|            |                                                     | <i>T. angustula</i>  |             |          |          |
| GO:0045333 | cellular respiration                                | 72                   | 7           | 0.49     | 4.30E-07 |
| GO:0008152 | metabolic process                                   | 3868                 | 41          | 26.24    | 5.70E-07 |
| GO:0006091 | generation of precursor metabolites and energy      | 136                  | 8           | 0.92     | 2.90E-06 |
| GO:0022900 | electron transport chain                            | 35                   | 5           | 0.24     | 3.20E-06 |
| GO:0055114 | oxidation-reduction process                         | 138                  | 8           | 0.94     | 3.20E-06 |
| GO:0015980 | energy derivation by oxidation of organic compounds | 102                  | 7           | 0.69     | 4.60E-06 |
| GO:0005975 | carbohydrate metabolic process                      | 379                  | 12          | 2.57     | 5.10E-06 |
| GO:0009060 | aerobic respiration                                 | 51                   | 5           | 0.35     | 2.10E-05 |
| GO:0022904 | respiratory electron transport chain                | 27                   | 4           | 0.18     | 2.90E-05 |
| GO:0006119 | oxidative phosphorylation                           | 30                   | 4           | 0.2      | 4.40E-05 |

|                                   |                                                             |      |    |       |          |
|-----------------------------------|-------------------------------------------------------------|------|----|-------|----------|
| GO:0006665                        | sphingolipid metabolic process                              | 14   | 3  | 0.09  | 0.0001   |
| GO:0019646                        | aerobic electron transport chain                            | 6    | 2  | 0.04  | 0.00066  |
| GO:0071704                        | organic substance metabolic process                         | 3675 | 35 | 24.93 | 0.00125  |
| GO:0006643                        | membrane lipid metabolic process                            | 38   | 3  | 0.26  | 0.00208  |
| GO:0016310                        | phosphorylation                                             | 137  | 5  | 0.93  | 0.00219  |
| GO:0006013                        | mannose metabolic process                                   | 11   | 2  | 0.07  | 0.00238  |
| GO:0006122                        | mitochondrial electron transport, ubiquinol to cytochrome c | 12   | 2  | 0.08  | 0.00284  |
| GO:0015074                        | DNA integration                                             | 48   | 3  | 0.33  | 0.00407  |
| GO:0046034                        | ATP metabolic process                                       | 98   | 4  | 0.66  | 0.00419  |
| GO:0006629                        | lipid metabolic process                                     | 398  | 8  | 2.7   | 0.00472  |
| GO:0042775                        | mitochondrial ATP synthesis coupled electron transport      | 16   | 2  | 0.11  | 0.00508  |
| GO:0044238                        | primary metabolic process                                   | 3416 | 32 | 23.18 | 0.00517  |
| GO:0009144                        | purine nucleoside triphosphate metabolic process            | 107  | 4  | 0.73  | 0.00573  |
| GO:0009205                        | purine ribonucleoside triphosphate metabolic process        | 107  | 4  | 0.73  | 0.00573  |
| GO:0000270                        | peptidoglycan metabolic process                             | 17   | 2  | 0.12  | 0.00574  |
| GO:0006027                        | glycosaminoglycan catabolic process                         | 17   | 2  | 0.12  | 0.00574  |
| GO:0009253                        | peptidoglycan catabolic process                             | 17   | 2  | 0.12  | 0.00574  |
| GO:0009199                        | ribonucleoside triphosphate metabolic process               | 112  | 4  | 0.76  | 0.00673  |
| GO:0009141                        | nucleoside triphosphate metabolic process                   | 114  | 4  | 0.77  | 0.00716  |
| GO:0042773                        | ATP synthesis coupled electron transport                    | 20   | 2  | 0.14  | 0.00791  |
| <b><i>A. mellifera</i> - head</b> |                                                             |      |    |       |          |
| GO:0055114                        | oxidation-reduction process                                 | 472  | 85 | 39.08 | 4.20E-10 |
| GO:0006099                        | tricarboxylic acid cycle                                    | 24   | 12 | 1.99  | 9.90E-08 |
| GO:0040003                        | chitin-based cuticle development                            | 104  | 27 | 8.61  | 9.90E-07 |
| GO:0006030                        | chitin metabolic process                                    | 50   | 17 | 4.14  | 3.90E-06 |
| GO:0035002                        | liquid clearance, open tracheal system                      | 18   | 7  | 1.49  | 3.60E-04 |

|            |                                                      |     |    |       |          |
|------------|------------------------------------------------------|-----|----|-------|----------|
| GO:0045214 | sarcomere organization                               | 43  | 11 | 3.56  | 9.70E-04 |
| GO:0035159 | regulation of tube length, open tracheal...          | 36  | 10 | 2.98  | 1.43E-03 |
| GO:0007608 | sensory perception of smell                          | 129 | 14 | 10.68 | 1.55E-03 |
| GO:0042776 | mitochondrial ATP synthesis coupled proton transport | 4   | 3  | 0.33  | 2.12E-03 |
| GO:0018298 | protein-chromophore linkage                          | 4   | 3  | 0.33  | 2.12E-03 |
| GO:0015812 | gamma-aminobutyric acid transport                    | 4   | 3  | 0.33  | 2.12E-03 |
| GO:0006102 | isocitrate metabolic process                         | 4   | 3  | 0.33  | 2.12E-03 |
| GO:0006723 | cuticle hydrocarbon biosynthetic process             | 4   | 3  | 0.33  | 2.12E-03 |
| GO:0034625 | fatty acid elongation, monounsaturated fatty acid    | 13  | 5  | 1.08  | 2.80E-03 |
| GO:0034626 | fatty acid elongation, polyunsaturated fatty acid    | 13  | 5  | 1.08  | 2.80E-03 |
| GO:0015813 | L-glutamate transmembrane transport                  | 13  | 5  | 1.08  | 2.80E-03 |
| GO:0019367 | fatty acid elongation, saturated fatty acid          | 13  | 5  | 1.08  | 2.80E-03 |
| GO:0022900 | electron transport chain                             | 106 | 16 | 8.78  | 4.48E-03 |
| GO:0005975 | carbohydrate metabolic process                       | 212 | 28 | 17.55 | 4.69E-03 |
| GO:0006583 | melanin biosynthetic process from tyrosine           | 5   | 3  | 0.41  | 4.97E-03 |
| GO:0007508 | larval heart development                             | 5   | 3  | 0.41  | 4.97E-03 |
| GO:0035151 | regulation of tube size, open tracheal system        | 51  | 15 | 4.22  | 5.40E-03 |
| GO:0042742 | defense response to bacterium                        | 151 | 16 | 12.5  | 5.62E-03 |
| GO:1903712 | cysteine transmembrane transport                     | 2   | 2  | 0.17  | 6.84E-03 |
| GO:0006002 | fructose 6-phosphate metabolic process               | 2   | 2  | 0.17  | 6.84E-03 |
| GO:0070777 | D-aspartate transport                                | 2   | 2  | 0.17  | 6.84E-03 |
| GO:0060415 | muscle tissue morphogenesis                          | 2   | 2  | 0.17  | 6.84E-03 |
| GO:0006196 | AMP catabolic process                                | 2   | 2  | 0.17  | 6.84E-03 |
| GO:0006104 | succinyl-CoA metabolic process                       | 2   | 2  | 0.17  | 6.84E-03 |
| GO:0046680 | response to DDT                                      | 2   | 2  | 0.17  | 6.84E-03 |
| GO:0042761 | very long-chain fatty acid biosynthetic process      | 16  | 5  | 1.32  | 7.73E-03 |

|                                      |                                                                      |     |     |        |          |
|--------------------------------------|----------------------------------------------------------------------|-----|-----|--------|----------|
| GO:0006559                           | L-phenylalanine catabolic process                                    | 6   | 3   | 0.5    | 9.33E-03 |
| GO:0061343                           | cell adhesion involved in heart morphoge...                          | 11  | 4   | 0.91   | 9.57E-03 |
| GO:0036378                           | calcitriol biosynthetic process from cal...                          | 11  | 4   | 0.91   | 9.57E-03 |
| <b><i>A. mellifera</i> - thorax</b>  |                                                                      |     |     |        |          |
| GO:0032543                           | mitochondrial translation                                            | 95  | 70  | 23.95  | 5.90E-20 |
| GO:0006120                           | mitochondrial electron transport, NADH to ubiquinone                 | 30  | 22  | 7.56   | 4.10E-08 |
| GO:0061077                           | chaperone-mediated protein folding                                   | 30  | 19  | 7.56   | 2.80E-07 |
| GO:0055114                           | oxidation-reduction process                                          | 472 | 200 | 119.01 | 8.20E-07 |
| GO:0015986                           | ATP synthesis coupled proton transport                               | 14  | 14  | 3.53   | 1.00E-06 |
| GO:0006099                           | tricarboxylic acid cycle                                             | 24  | 16  | 6.05   | 2.20E-05 |
| GO:0010998                           | regulation of translational initiation by eIF2 alpha phosphorylation | 10  | 8   | 2.52   | 4.40E-04 |
| GO:0008340                           | determination of adult lifespan                                      | 140 | 53  | 35.3   | 5.70E-04 |
| GO:0002181                           | cytoplasmic translation                                              | 123 | 45  | 31.01  | 8.30E-04 |
| GO:0006122                           | mitochondrial electron transport, ubiquinol to cytochrome c          | 14  | 9   | 3.53   | 2.27E-03 |
| GO:0006123                           | mitochondrial electron transport, cytochrome c to oxygen             | 10  | 7   | 2.52   | 3.67E-03 |
| GO:0042776                           | mitochondrial ATP synthesis coupled proton transport                 | 4   | 4   | 1.01   | 4.03E-03 |
| GO:0006108                           | malate metabolic process                                             | 4   | 4   | 1.01   | 4.03E-03 |
| GO:0006094                           | gluconeogenesis                                                      | 8   | 6   | 2.02   | 4.81E-03 |
| GO:0042744                           | hydrogen peroxide catabolic process                                  | 6   | 5   | 1.51   | 4.81E-03 |
| GO:0033617                           | mitochondrial cytochrome c oxidase assembly                          | 13  | 8   | 3.28   | 5.93E-03 |
| GO:0050829                           | defense response to Gram-negative bacterium                          | 76  | 30  | 19.16  | 5.95E-03 |
| GO:1904262                           | negative regulation of TORC1 signaling                               | 11  | 7   | 2.77   | 7.91E-03 |
| GO:0045214                           | sarcomere organization                                               | 43  | 19  | 10.84  | 9.19E-03 |
| <b><i>A. mellifera</i> - abdomen</b> |                                                                      |     |     |        |          |

|            |                                                                       |     |     |       |          |
|------------|-----------------------------------------------------------------------|-----|-----|-------|----------|
| GO:0055114 | oxidation-reduction process                                           | 472 | 123 | 91.29 | 1.10E-04 |
| GO:0045214 | sarcomere organization                                                | 43  | 20  | 8.32  | 4.40E-04 |
| GO:0006636 | unsaturated fatty acid biosynthetic process                           | 10  | 7   | 1.93  | 0.00101  |
| GO:0014009 | glial cell proliferation                                              | 15  | 5   | 2.9   | 0.0014   |
| GO:0002347 | response to tumor cell                                                | 7   | 5   | 1.35  | 0.00398  |
| GO:0007523 | larval visceral muscle development                                    | 5   | 4   | 0.97  | 0.0059   |
| GO:0009253 | peptidoglycan catabolic process                                       | 5   | 4   | 0.97  | 0.0059   |
| GO:0006030 | chitin metabolic process                                              | 50  | 20  | 9.67  | 0.00656  |
| GO:0036065 | fucosylation                                                          | 10  | 5   | 1.93  | 0.00721  |
| GO:0010797 | regulation of multivesicular body size involved in endosome transport | 3   | 3   | 0.58  | 0.00722  |
| GO:0035999 | tetrahydrofolate interconversion                                      | 3   | 3   | 0.58  | 0.00722  |
| GO:0034553 | mitochondrial respiratory chain complex II assembly                   | 3   | 3   | 0.58  | 0.00722  |
| GO:0043508 | negative regulation of JUN kinase activity                            | 3   | 3   | 0.58  | 0.00722  |
| GO:0040003 | chitin-based cuticle development                                      | 104 | 34  | 20.11 | 0.00829  |
| GO:0097502 | mannosylation                                                         | 18  | 6   | 3.48  | 0.00896  |
| GO:0050830 | defense response to Gram-positive bacterium                           | 14  | 8   | 2.71  | 0.00974  |
| GO:0061327 | anterior Malpighian tubule development                                | 11  | 6   | 2.13  | 0.0098   |

**Table SIII** Orthogroups identified using OrthoFinder, in bold are highlighted our transcriptomic data.

|                                                     | <i>A. cerana</i> | <i>A. mellifera</i> | <i>B. impatiens</i> | <b><i>B. terrestris</i><br/>transcriptome</b> | <i>B. terrestris</i> | <i>E. dilemma</i> | <i>E. mexicana</i> | <i>F. varia</i> | <i>M. quadrifasciata</i> | <b><i>T. angustula</i><br/>transcriptome</b> | <i>H. laboriosa</i> |
|-----------------------------------------------------|------------------|---------------------|---------------------|-----------------------------------------------|----------------------|-------------------|--------------------|-----------------|--------------------------|----------------------------------------------|---------------------|
| Number of genes                                     | 20,933           | 23,471              | 24,471              | <b>32,428</b>                                 | 22,091               | 15,904            | 15,659             | 11,127          | 14,257                   | <b>37,396</b>                                | 12,256              |
| Number of genes in orthogroups                      | 20,669           | 23,321              | 24,239              | <b>29,116</b>                                 | 21,939               | 11,788            | 15,482             | 10,596          | 10,956                   | <b>29,408</b>                                | 12,140              |
| Number of unassigned genes                          | 264              | 150                 | 232                 | <b>3,312</b>                                  | 152                  | 4,116             | 177                | 531             | 3,301                    | <b>7,988</b>                                 | 116                 |
| Percentage of genes in orthogroups                  | 98.7             | 99.4                | 99.1                | <b>89.8</b>                                   | 99.3                 | 74.1              | 98.9               | 95.2            | 76.8                     | <b>78.6</b>                                  | 99.1                |
| Percentage of unassigned genes                      | 1.3              | 0.6                 | 0.9                 | <b>10.2</b>                                   | 0.7                  | 25.9              | 1.1                | 4.8             | 23.2                     | <b>21.4</b>                                  | 0.9                 |
| Number of orthogroups containing species            | 9,926            | 9,651               | 10,015              | <b>12,140</b>                                 | 10,022               | 9,880             | 9,598              | 9,340           | 9,272                    | <b>12,660</b>                                | 9,436               |
| Percentage of orthogroups containing species        | 59.8             | 58.1                | 60.3                | <b>73.1</b>                                   | 60.4                 | 59.5              | 57.8               | 56.3            | 55.8                     | <b>76.3</b>                                  | 56.8                |
| Number of species-specific orthogroups              | 64               | 35                  | 42                  | <b>1,153</b>                                  | 23                   | 109               | 38                 | 37              | 64                       | <b>1,944</b>                                 | 19                  |
| Number of genes in species-specific orthogroups     | 173              | 132                 | 118                 | <b>3,138</b>                                  | 58                   | 1,116             | 97                 | 90              | 351                      | <b>5,662</b>                                 | 67                  |
| Percentage of genes in species-specific orthogroups | 0.8              | 0.6                 | 0.5                 | <b>9.7</b>                                    | 0.3                  | 7.0               | 0.6                | 0.8             | 2.5                      | <b>15.1</b>                                  | 0.5                 |

**Table SIV** Number and proportion of orthogroups occurring in the different taxonomic classes.

| Orthogroup classification                                                                                 | all orthogroups | all orthogroups % | <i>B. terrestris</i> transcriptome % | <i>B. terrestris</i> DET | <i>B. terrestris</i> DET % | <i>T. angustula</i> transcriptome % | <i>T. angustula</i> DET | <i>T. angustula</i> DET % |
|-----------------------------------------------------------------------------------------------------------|-----------------|-------------------|--------------------------------------|--------------------------|----------------------------|-------------------------------------|-------------------------|---------------------------|
| Present only in all <i>Bombus</i> [ <b>bumblebees</b> ]                                                   | 77              | 0.46%             | 0.63%                                | 13                       | 1.35%                      | n.a.                                | n.a.                    | n.a.                      |
| Present only in both <i>B. terrestris</i> , ignoring the absents in the genome [ <b>bterrestris (G)</b> ] | 1284            | 7.73%             | 10.58%                               | 165                      | 17.15%                     | n.a.                                | n.a.                    | n.a.                      |
| Present only in both <i>B. terrestris</i> [ <b>specie-specific</b> ]                                      | 108             | 0.65%             | 0.89%                                | 12                       | 1.25%                      | n.a.                                | n.a.                    | n.a.                      |
| Present only in the Stingless bees, ignoring the absents in <i>F. varia</i> [ <b>stingless bees (F)</b> ] | 97              | 0.58%             | n.a.                                 | n.a.                     | n.a.                       | 0.77%                               | 4                       | 2.55%                     |
| Present only on the Stingless bees [ <b>stingless bees</b> ]                                              | 10              | 0.06%             | n.a.                                 | n.a.                     | n.a.                       | 0.08%                               | 1                       | 0.64%                     |
| Present only in <i>T. angustula</i> [ <b>specie-specific</b> ]                                            | 1944            | 11.71%            | n.a.                                 | n.a.                     | n.a.                       | 15.36%                              | 40                      | 25.48%                    |
| Present only in all corbiculates [ <b>corbiculates</b> ]                                                  | 81              | 0.49%             | 0.67%                                | 4                        | 0.42%                      | 0.64%                               | 0                       | 0.00%                     |
| Present only in all social corbiculates [ <b>social corbiculates</b> ]                                    | 3               | 0.02%             | 0.02%                                | 0                        | 0.00%                      | 0.02%                               | 0                       | 0.00%                     |
| present in all species [ <b>apinae</b> ]                                                                  | 6326            | 38.10%            | 52.11%                               | 449                      | 46.67%                     | 49.97%                              | 69                      | 43.95%                    |



**Table SV** Complete list of genes differentially expressed common between *A. mellifera* and *B. terrestris*

| <i>A. mellifera</i> head and <i>B. terrestris</i>                           | common high in nurses? | common high in foragers? | other body parts DE |
|-----------------------------------------------------------------------------|------------------------|--------------------------|---------------------|
| [1] "a disintegrin and metalloproteinase with thrombospondin motifs 7-like" |                        | yes                      |                     |
| [2] "atrial natriuretic peptide receptor 1"                                 |                        |                          |                     |
| [3] "basement membrane-specific heparan sulfate proteoglycan core protein"  |                        |                          | abdomen, thorax     |
| [4] "cadherin-89d"                                                          |                        |                          | abdomen, thorax     |
| [5] "choline/ethanolamine kinase"                                           |                        |                          | abdomen, thorax     |
| [6] "cytochrome c"                                                          | yes                    |                          |                     |
| [7] "cytochrome p450 6a2"                                                   |                        | yes                      | thorax              |
| [8] "dentin sialophosphoprotein-like"                                       |                        |                          | abdomen             |
| [9] "ef-hand domain-containing family member c2-like"                       |                        |                          |                     |
| [10] "elongation of very long chain fatty acids protein 6"                  |                        |                          | abdomen, thorax     |
| [11] "excitatory amino acid transporter"                                    |                        | yes                      | abdomen, thorax     |
| [12] "facilitated trehalose transporter tret1"                              |                        | yes                      | abdomen, thorax     |
| [13] "fatty acyl-coa reductase 1"                                           |                        | yes                      | abdomen             |
| [14] "golgin-84"                                                            |                        |                          |                     |
| [15] "heparan-alpha-glucosaminide n-acetyltransferase-like"                 | yes                    |                          |                     |
| [16] "histone h3"                                                           |                        |                          | abdomen             |
| [17] "hmg box-containing protein 4"                                         |                        |                          | thorax              |
| [18] "innexin"                                                              | yes                    |                          | thorax              |
| [19] "lachesin"                                                             | yes                    |                          | thorax              |
| [20] "major royal jelly protein 1"                                          |                        |                          | abdomen, thorax     |
| [21] "maternal protein exuperantia"                                         |                        | yes                      | thorax              |
| [22] "molybdenum cofactor sulfurase 1"                                      |                        | yes                      | thorax              |
| [23] "mucin-19-like"                                                        |                        |                          | abdomen             |
| [24] "mucin-2-like"                                                         |                        |                          | abdomen             |
| [25] "myosin-2 heavy chain"                                                 |                        | yes                      |                     |
| [26] "nicotinate phosphoribosyltransferase"                                 |                        | yes                      | abdomen             |
| [27] "nuclear hormone receptor ftz-f1"                                      |                        |                          | thorax              |
| [28] "protein 5nuc-like"                                                    |                        | yes                      | abdomen             |
| [29] "protein diaphanous"                                                   |                        | yes                      |                     |
| [30] "protein inscuteable homolog"                                          |                        |                          | abdomen, thorax     |
| [31] "protein lunapark-b"                                                   | yes                    |                          | thorax              |
| [32] "protein quiver"                                                       |                        |                          | thorax              |
| [33] "protein scarlet"                                                      | yes                    |                          |                     |
| [34] "proton-coupled amino acid transporter 1"                              |                        | yes                      | abdomen, thorax     |
| [35] "putative inorganic phosphate cotransporter"                           |                        |                          | abdomen, thorax     |

|                                                                                         |     |     |                 |
|-----------------------------------------------------------------------------------------|-----|-----|-----------------|
| [36] "rho guanine nucleotide exchange factor 12"                                        |     |     |                 |
| [37] "scavenger receptor class b member 1"                                              |     |     | abdomen, thorax |
| [38] "sialin"                                                                           |     | yes | abdomen, thorax |
| [39] "sodium-independent sulfate anion transporter-like"                                |     | yes | abdomen, thorax |
| [40] "sodium/hydrogen exchanger"                                                        |     | yes | thorax          |
| [41] "tyrosine-protein kinase btk29a"                                                   | yes |     | abdomen, thorax |
| [42] "udp-n-acetylglucosamine--peptide n-acetylglucosaminyltransferase 110 kda subunit" |     |     | abdomen         |
| <b><i>A. mellifera thorax and B. terrestris</i></b>                                     |     |     |                 |
| [1] "14-3-3 protein zeta"                                                               |     | yes |                 |
| [2] "activating molecule in becn1-regulated autophagy protein 1-like"                   | yes |     |                 |
| [3] "adenosine deaminase cecr1-like"                                                    | yes |     | abdomen         |
| [4] "aftiphilin"                                                                        |     | yes |                 |
| [5] "alpha-tubulin n-acetyltransferase"                                                 |     |     | abdomen         |
| [6] "aminopeptidase n"                                                                  |     |     |                 |
| [7] "apoptosis-inducing factor 3"                                                       |     |     |                 |
| [8] "basement membrane-specific heparan sulfate proteoglycan core protein"              |     |     | abdomen, head   |
| [9] "cadherin-89d"                                                                      |     |     | abdomen, head   |
| [10] "calcium-binding mitochondrial carrier protein aralar1"                            |     | yes |                 |
| [11] "cathepsin l1"                                                                     | yes |     |                 |
| [12] "choline/ethanolamine kinase"                                                      |     |     | abdomen, head   |
| [13] "chromatin assembly factor 1 subunit b"                                            | yes |     |                 |
| [14] "coronin"                                                                          |     |     |                 |
| [15] "cytochrome p450 6a2"                                                              |     | yes | head            |
| [16] "dep domain-containing protein 5"                                                  |     | yes |                 |
| [17] "dna ligase 1"                                                                     | yes |     |                 |
| [18] "dna polymerase theta"                                                             |     |     |                 |
| [19] "dna polymerase zeta catalytic subunit"                                            |     |     |                 |
| [20] "dopamine n-acetyltransferase"                                                     |     |     | abdomen         |
| [21] "down syndrome cell adhesion molecule-like protein dscam2"                         |     |     | abdomen         |
| [22] "elongation of very long chain fatty acids protein"                                |     |     | abdomen, head   |
| [23] "epidermal growth factor receptor"                                                 |     |     | abdomen         |
| [24] "esterase b1-like"                                                                 |     |     | abdomen         |
| [25] "excitatory amino acid transporter"                                                |     | yes | abdomen, head   |
| [26] "exosome complex component rrp45-like"                                             | yes |     |                 |
| [27] "facilitated trehalose transporter tret1"                                          |     | yes | abdomen, head   |
| [28] "facilitated trehalose transporter tret1-2 homolog"                                |     | yes |                 |

|                                                                                    |     |     |               |
|------------------------------------------------------------------------------------|-----|-----|---------------|
| [29] "fibrillin-2"                                                                 |     | yes | abdomen       |
| [30] "hemocytin"                                                                   |     | yes |               |
| [31] "hmg box-containing protein 4"                                                |     |     | head          |
| [32] "innexin"                                                                     | yes |     | head          |
| [33] "integral membrane protein gpr155"                                            |     | yes |               |
| [34] "integrator complex subunit 8"                                                |     | yes |               |
| [35] "lachesin"                                                                    |     |     | head          |
| [36] "major royal jelly protein 1"                                                 | yes |     | abdomen, head |
| [37] "maternal protein exuperantia"                                                |     | yes | head          |
| [38] "microtubule-associated protein futsch"                                       |     | yes | abdomen       |
| [39] "mitotic spindle assembly checkpoint protein mad2a"                           | yes |     |               |
| [40] "mlx-interacting protein"                                                     |     | yes |               |
| [41] "molybdenum cofactor sulfurase 1"                                             |     | yes | head          |
| [42] "niemann-pick c1 protein-like"                                                |     | yes |               |
| [43] "nose resistant to fluoxetine protein 6-like"                                 |     | yes | abdomen       |
| [44] "nuclear hormone receptor ftz-f1"                                             |     |     | head          |
| [45] "palmitoyltransferase"                                                        |     |     | abdomen       |
| [46] "peroxidase"                                                                  |     | yes | abdomen       |
| [47] "phosphatidylinositol 4-phosphate 3-kinase c2 domain-containing subunit beta" |     | yes | abdomen       |
| [48] "phosphodiesterase"                                                           |     |     |               |
| [49] "phospholipid-transporting atpase"                                            |     | yes | abdomen       |
| [50] "piezo-type mechanosensitive ion channel component"                           |     | yes |               |
| [51] "proteasome subunit alpha type"                                               |     |     |               |
| [52] "protein inscuteable homolog"                                                 |     |     | abdomen, head |
| [53] "protein lunapark-b"                                                          | yes |     | head          |
| [54] "protein quiver"                                                              |     | yes | head          |
| [55] "protein takeout-like"                                                        | yes |     | abdomen       |
| [56] "protein tilb homolog"                                                        |     | yes | abdomen       |
| [57] "protein yellow"                                                              | yes |     | abdomen       |
| [58] "proton-coupled amino acid transporter 1"                                     |     | yes | abdomen, head |
| [59] "proton-coupled amino acid transporter 4"                                     |     | yes |               |
| [60] "putative fatty acyl-coa reductase cg5065"                                    |     |     | abdomen       |
| [61] "putative inorganic phosphate cotransporter"                                  |     | yes | abdomen, head |
| [62] "putative phospholipase b-like lamina ancestor"                               |     | yes |               |
| [63] "rna-binding protein 1"                                                       |     |     |               |
| [64] "rna-binding protein fusilli"                                                 |     | yes | abdomen       |
| [65] "scavenger receptor class b member 1"                                         |     | yes | abdomen, head |
| [66] "serine/threonine-protein kinase tricornet"                                   |     | yes |               |
| [67] "sialin"                                                                      |     | yes | abdomen, head |

|                                                                            |     |     |               |
|----------------------------------------------------------------------------|-----|-----|---------------|
| [68] "slit homolog 1 protein-like"                                         |     | yes |               |
| [69] "sodium-independent sulfate anion transporter-like"                   |     | yes | abdomen, head |
| [70] "sodium/hydrogen exchanger"                                           |     | yes | head          |
| [71] "solute carrier organic anion transporter family member 4a1"          |     | yes |               |
| [72] "stress response protein nst1"                                        |     |     |               |
| [73] "targeting protein for xklp2-like"                                    |     |     |               |
| [74] "tectonin beta-propeller repeat-containing protein"                   |     | yes |               |
| [75] "telomerase reverse transcriptase"                                    |     |     | abdomen       |
| [76] "thioredoxin domain-containing protein"                               |     |     |               |
| [77] "thymidylate synthase"                                                | yes |     |               |
| [78] "titin"                                                               |     | yes |               |
| [79] "tld domain-containing protein 2"                                     |     | yes |               |
| [80] "transcription factor spt20 homolog"                                  |     |     |               |
| [81] "tyrosine-protein kinase btk29a"                                      | yes |     | abdomen, head |
| [82] "zinc finger hit domain-containing protein 3"                         | yes |     |               |
| <b><i>A. mellifera abdomen and B. terrestris</i></b>                       |     |     |               |
| [1] "40s ribosomal protein s6"                                             | yes |     |               |
| [2] "adenosine deaminase cecr1-like"                                       | yes |     | thorax        |
| [3] "alpha-tubulin n-acetyltransferase"                                    | yes |     | thorax        |
| [4] "ankyrin repeat domain-containing protein 7-like"                      |     |     |               |
| [5] "atp-dependent (s)-nad(p)h-hydrate dehydratase"                        |     |     |               |
| [6] "basement membrane-specific heparan sulfate proteoglycan core protein" |     |     | head, thorax  |
| [7] "cadherin-89d"                                                         |     |     | head, thorax  |
| [8] "chitobiosyldiphosphodolichol beta-mannosyltransferase"                |     | yes |               |
| [9] "choline/ethanolamine kinase"                                          |     |     | head, thorax  |
| [10] "clathrin heavy chain"                                                |     |     |               |
| [11] "cryptochrome 2"                                                      |     |     |               |
| [12] "denn domain-containing protein 5b"                                   | yes |     |               |
| [13] "dentin sialophosphoprotein-like"                                     |     |     | head          |
| [14] "dopamine n-acetyltransferase"                                        |     |     | thorax        |
| [15] "down syndrome cell adhesion molecule"                                |     |     | thorax        |
| [16] "elongation of very long chain fatty acids protein aael008004"        | yes |     | head, thorax  |
| [17] "embryonic polarity protein dorsal"                                   | yes |     |               |
| [18] "epidermal growth factor receptor"                                    |     |     | thorax        |
| [19] "esterase b1-like"                                                    |     |     | thorax        |
| [20] "excitatory amino acid transporter 1"                                 |     | yes | head, thorax  |

|                                                                                    |     |     |              |
|------------------------------------------------------------------------------------|-----|-----|--------------|
| [21] "facilitated trehalose transporter tret1"                                     |     | yes | head, thorax |
| [22] "fatty acyl-coa reductase 1"                                                  |     | yes | head         |
| [23] "fibrillin-2-like"                                                            |     |     | thorax       |
| [24] "fibroin heavy chain"                                                         |     | yes |              |
| [25] "flavin-containing monooxygenase"                                             |     | yes |              |
| [26] "glycogen synthase kinase-3 beta"                                             | yes |     |              |
| [27] "glycolipid transfer protein"                                                 |     |     |              |
| [28] "golgin subfamily a member 6-like protein 22"                                 | yes | yes |              |
| [29] "histone h3"                                                                  |     |     | head         |
| [30] "lysozyme"                                                                    |     | yes |              |
| [31] "major royal jelly protein 1"                                                 | yes |     | head, thorax |
| [32] "microtubule-associated protein futsch"                                       |     |     | thorax       |
| [33] "mitogen-activated protein kinase"                                            |     |     |              |
| [34] "mucin-19-like"                                                               |     |     | head         |
| [35] "mucin-2-like"                                                                |     |     | head         |
| [36] "muscle m-line assembly protein unc-89"                                       |     |     |              |
| [37] "nicotinate phosphoribosyltransferase"                                        |     | yes | head         |
| [38] "nose resistant to fluoxetine protein 6-like"                                 |     |     | thorax       |
| [39] "nuclear receptor subfamily 1 group d member 2"                               |     |     |              |
| [40] "nucleolar protein 58"                                                        | yes |     |              |
| [41] "palmitoyltransferase"                                                        |     | yes | thorax       |
| [42] "peptide transporter family 1"                                                |     |     |              |
| [43] "peroxidase"                                                                  |     | yes | thorax       |
| [44] "phosphatidylinositol 4-phosphate 3-kinase c2 domain-containing subunit beta" |     | yes | thorax       |
| [45] "phospholipid-transporting atpase"                                            |     |     | thorax       |
| [46] "pre-mrna-processing-splicing factor 8"                                       |     |     |              |
| [47] "protein 5nuc-like"                                                           |     | yes | head         |
| [48] "protein claret segregational"                                                | yes |     |              |
| [49] "protein downstream neighbor of son homolog"                                  | yes |     |              |
| [50] "protein inscuteable homolog"                                                 |     |     | head, thorax |
| [51] "protein ndrg3"                                                               |     |     |              |
| [52] "protein takeout-like"                                                        | yes |     | thorax       |
| [53] "protein tilb homolog"                                                        |     |     | thorax       |
| [54] "protein yellow"                                                              | yes |     | thorax       |
| [55] "proton-coupled amino acid transporter 1"                                     |     | yes | head, thorax |
| [56] "putative fatty acyl-coa reductase cg5065"                                    |     |     | thorax       |
| [57] "putative inorganic phosphate cotransporter"                                  |     |     | head, thorax |
| [58] "putative mediator of rna polymerase ii transcription subunit 26"             |     |     |              |
| [59] "regulator of microtubule dynamics protein 1-like"                            |     | yes |              |

|                                                                                         |     |     |              |
|-----------------------------------------------------------------------------------------|-----|-----|--------------|
| [60] "reticulon-1"                                                                      | yes |     |              |
| [61] "rna-binding protein fusilli"                                                      |     |     | thorax       |
| [62] "s-phase kinase-associated protein 2"                                              | yes |     |              |
| [63] "scavenger receptor class b member 1"                                              |     |     | head, thorax |
| [64] "serine/threonine-protein kinase mark2"                                            |     |     |              |
| [65] "sialin"                                                                           |     | yes | head, thorax |
| [66] "sodium-independent sulfate anion transporter-like"                                |     | yes | head, thorax |
| [67] "telomerase reverse transcriptase"                                                 |     |     | thorax       |
| [68] "transmembrane protein 8b"                                                         |     | yes |              |
| [69] "tyrosine-protein kinase btk29a"                                                   | yes |     | head, thorax |
| [70] "u3 small nucleolar ribonucleoprotein protein imp3"                                |     |     |              |
| [71] "udp-glucose 6-dehydrogenase"                                                      |     | yes |              |
| [72] "udp-n-acetylglucosamine--peptide n-acetylglucosaminyltransferase 110 kda subunit" |     |     | head         |
| [73] "unconventional myosin-xv"                                                         |     |     |              |
| [74] "vascular endothelial growth factor receptor 1"                                    |     |     |              |

**Table SVI** Complete list of genes differentially expressed common between *A. mellifera* and *T. angustula*

| <i>A. mellifera</i> head and <i>T. angustula</i>                           | common high in nurses? | common high in foragers? | other body parts DE |
|----------------------------------------------------------------------------|------------------------|--------------------------|---------------------|
| [1] "3-hydroxyacyl-coa dehydrogenase type-2"                               | yes                    |                          | abdomen, thorax     |
| [2] "alpha-glucosidase"                                                    |                        | yes                      | thorax              |
| [3] "alpha-mannosidase"                                                    | yes                    |                          | thorax              |
| [4] "basement membrane-specific heparan sulfate proteoglycan core protein" | yes                    |                          | abdomen, thorax     |
| [5] "cytochrome b"                                                         |                        |                          | abdomen, thorax     |
| [6] "cytochrome c"                                                         | yes                    |                          |                     |
| [7] "cytochrome p450"                                                      |                        | yes                      | abdomen, thorax     |
| [8] "cytochrome p450 4c1"                                                  |                        |                          |                     |
| [9] "glucosylceramidase"                                                   |                        |                          | abdomen, thorax     |
| [10] "high affinity copper uptake protein 1"                               |                        |                          | thorax              |
| [11] "histone h2b"                                                         |                        |                          | thorax              |
| [12] "histone h3"                                                          |                        |                          | abdomen             |
| [13] "hyaluronan mediated motility receptor"                               |                        |                          | thorax              |
| [14] "lysosomal alpha-mannosidase-like"                                    |                        |                          |                     |
| [15] "mitochondrial cardiolipin hydrolase"                                 |                        |                          |                     |
| [16] "mucin-2-like"                                                        | yes                    |                          | abdomen             |
| [17] "peptidoglycan-recognition protein"                                   |                        |                          | abdomen, thorax     |
| [18] "prisilkin-39"                                                        | yes                    |                          | abdomen, thorax     |

|                                                                            |     |     |               |
|----------------------------------------------------------------------------|-----|-----|---------------|
| [19] "pupal cuticle protein c1b-like"                                      | yes |     |               |
| [20] "venom acid phosphatase acph-1-like"                                  |     | yes | thorax        |
| [21] "zinc transporter 1"                                                  |     |     |               |
| <b><i>A. mellifera thorax and T. angustula</i></b>                         |     |     |               |
| [1] "3-hydroxyacyl-coa dehydrogenase type-2"                               | yes |     | abdomen, head |
| [2] "alpha-glucosidase"                                                    |     | yes | head          |
| [3] "alpha-mannosidase"                                                    | yes |     | head          |
| [4] "basement membrane-specific heparan sulfate proteoglycan core protein" | yes |     | abdomen, head |
| [5] "caspase-1"                                                            | yes |     |               |
| [6] "cathepsin l"                                                          | yes |     |               |
| [7] "cytochrome b"                                                         | yes |     | abdomen, head |
| [8] "cytochrome p450"                                                      |     | yes | abdomen, head |
| [9] "glucosylceramidase"                                                   |     |     | abdomen, head |
| [10] "high affinity copper uptake protein 1"                               | yes |     | head          |
| [11] "histone h2b"                                                         | yes |     | head          |
| [12] "hyaluronan mediated motility receptor"                               |     |     | head          |
| [13] "hydroxysteroid dehydrogenase-like protein 2"                         |     | yes |               |
| [14] "lipase 3"                                                            | yes |     | abdomen       |
| [15] "metalloendopeptidase"                                                | yes |     |               |
| [16] "ornithine decarboxylase"                                             |     | yes | abdomen       |
| [17] "peptidoglycan-recognition protein"                                   |     |     | abdomen, head |
| [18] "phospholipase a1"                                                    | yes |     |               |
| [19] "prisilkin-39"                                                        | yes |     | abdomen, head |
| [20] "protein fam13a"                                                      |     | yes |               |
| [21] "putative fatty acyl-coa reductase cg5065"                            |     | yes | abdomen       |
| [22] "targeting protein for xklp2"                                         |     |     |               |
| [23] "trypsin-1"                                                           |     |     | abdomen       |
| [24] "venom acid phosphatase acph-1-like"                                  |     | yes | head          |
| <b><i>A. mellifera abdomen and T. angustula</i></b>                        |     |     |               |
| [1] "3-hydroxyacyl-coa dehydrogenase type-2"                               | yes |     | head, thorax  |
| [2] "anion exchange protein"                                               |     | yes |               |
| [3] "basement membrane-specific heparan sulfate proteoglycan core protein" | yes |     | head, thorax  |
| [4] "carboxypeptidase b-like"                                              | yes |     |               |
| [5] "chymotrypsin-1"                                                       |     |     |               |
| [6] "cytochrome b"                                                         | yes |     | head, thorax  |
| [7] "cytochrome p450"                                                      |     | yes | head, thorax  |
| [8] "glucosylceramidase"                                                   |     |     | head, thorax  |
| [9] "glucosylceramidase-like"                                              | yes |     |               |

|                                                 |     |     |              |
|-------------------------------------------------|-----|-----|--------------|
| [10] "helicase domino"                          |     |     |              |
| [11] "histone h3"                               |     |     | head         |
| [12] "lipase 3-like"                            |     |     | thorax       |
| [13] "mucin-2-like"                             | yes |     | head         |
| [14] "ornithine decarboxylase"                  |     | yes | thorax       |
| [15] "pdf receptor"                             |     |     |              |
| [16] "peptidoglycan-recognition protein"        |     |     | head, thorax |
| [17] "prisilkin-39"                             | yes |     | head, thorax |
| [18] "protein g12"                              | yes |     |              |
| [19] "putative fatty acyl-coa reductase cg5065" |     | yes | thorax       |
| [20] "trypsin-1"                                |     |     | thorax       |
| [21] "vanin-like protein 1"                     |     |     |              |

**Table SVII** Complete list of genes differentially expressed common between *B. terrestris* and *T. angustula*

| <i>B. terrestris</i> and <i>T. angustula</i>                                          | common high in nurses? | common high in foragers? |
|---------------------------------------------------------------------------------------|------------------------|--------------------------|
| [1] "at-rich interactive domain-containing protein 2"                                 |                        | yes                      |
| [2] "basement membrane-specific heparan sulfate proteoglycan core protein isoform x1" |                        |                          |
| [3] "cathepsin l"                                                                     | yes                    |                          |
| [4] "chymotrypsin-2-like"                                                             | yes                    |                          |
| [5] "cytochrome c oxidase subunit 1"                                                  | yes                    |                          |
| [6] "cytochrome p450"                                                                 |                        | yes                      |
| [7] "histone h3"                                                                      | yes                    |                          |
| [8] "mucin-2-like"                                                                    |                        |                          |
| [9] "putative fatty acyl-coa reductase cg5065"                                        |                        |                          |
| [10] "retrovirus-related pol polyprotein from transposon tnt 1-94"                    | yes                    |                          |
| [11] "sec23-interacting protein"                                                      |                        |                          |
| [12] "targeting protein for xklp2"                                                    | yes                    |                          |
| [13] "transposable element tc1 transposase"                                           | yes                    |                          |
| [14] "tubulin glycyclase 3a"                                                          |                        |                          |
| [15] "urea transporter 1-like"                                                        |                        |                          |



## Supplementary Figures

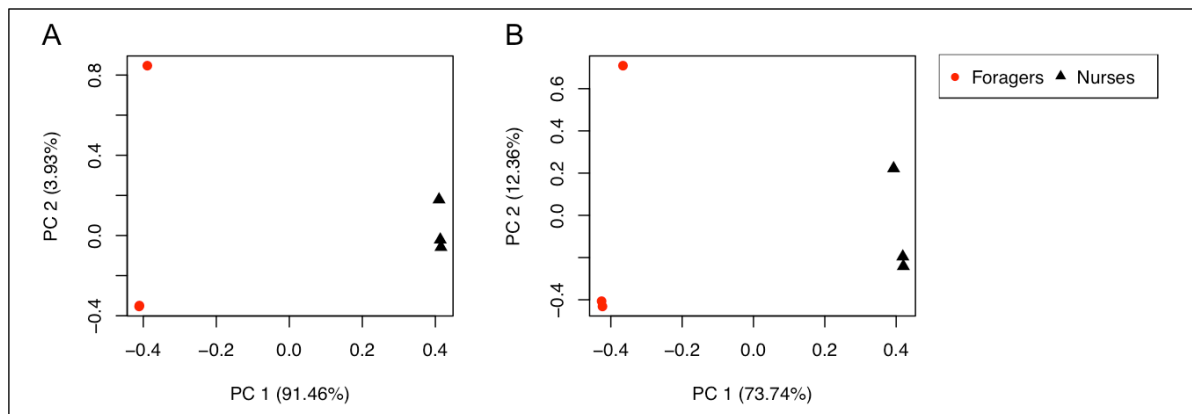

**Figure S1** Principal Component Analyses using superTranscripts normalized counts by DESeq2. The two principal components involved in sample differences are shown. **A-** *B. terrestris* data. **B-** *T. angustula* data.

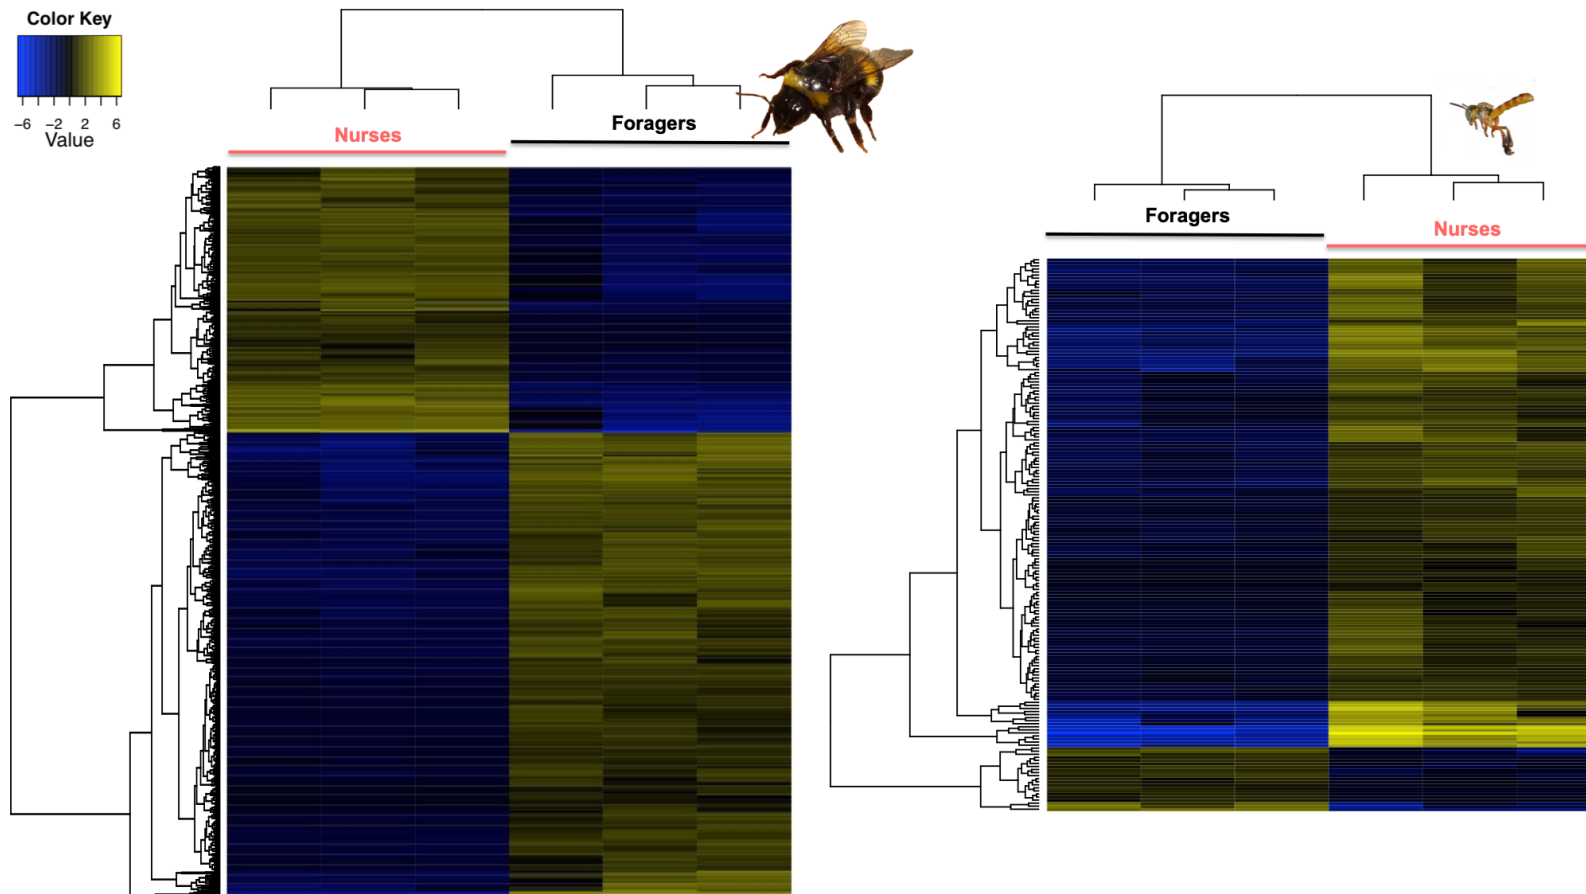

**Figure S2** Heatmap of the differentially expressed superTranscripts between foragers and nurses of *B. terrestris* (left; 1,203 superTranscripts) and *T. angustula* (right; 241 superTranscripts). Each row represents one superTranscript while columns are distinct sample replicates. Expression scale is on log<sub>2</sub> fold change (log<sub>2</sub>FC) and minimum differential expression difference between groups is of  $2 \cdot \log_2\text{FC}$ , i.e. approximately four-fold difference between groups. *B. terrestris* and *T. angustula* photo sizes are not scaled. *T. angustula* by L. Costa – image reproduced with permission from the original author.

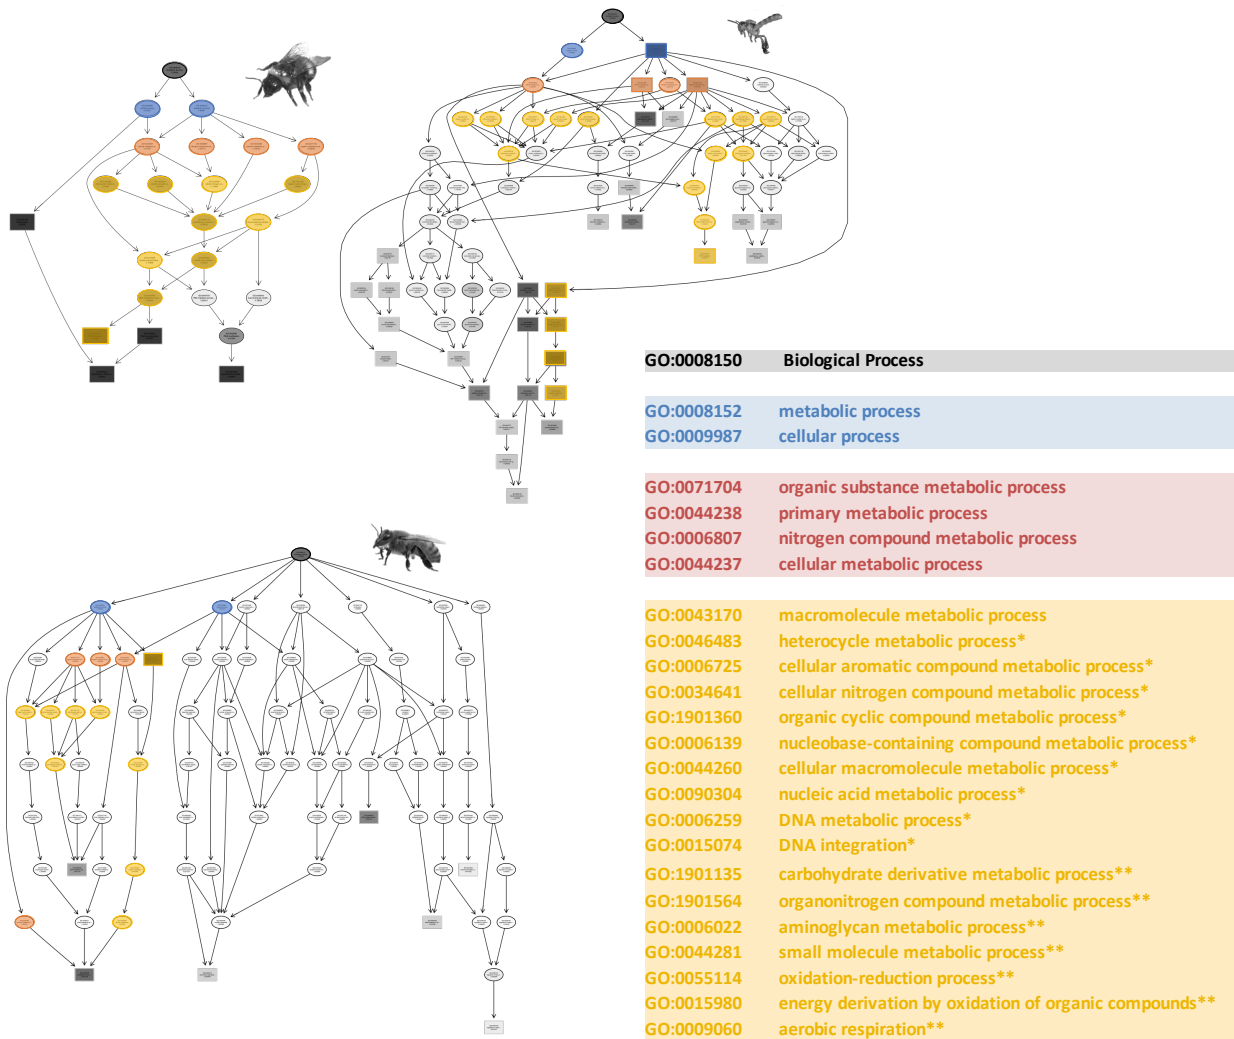

**Figure S3** Summarized overlap between subgraphs induced by the BP terms found enriched in the differentially expressed genes of all species. Colours highlight common BP terms in species subgraphs: black – common in the first hierarchical level; blue – common in the second hierarchical level; red – common in the third hierarchical level; yellow – common in all other levels. Squares represent significantly enriched terms ( $p < 0.01$ ) see Figures S4, S5 and S6 for details. The subgraph of the top 8 GO terms enriched in *A. mellifera* is shown. \* indicate terms common only to *B. terrestris* and *T. angustula*, \*\* terms common to *A. mellifera* and *T. angustula*. *A. mellifera* by A. Wide, *T. angustula* by L. Costa – images reproduced with permission from the original authors.

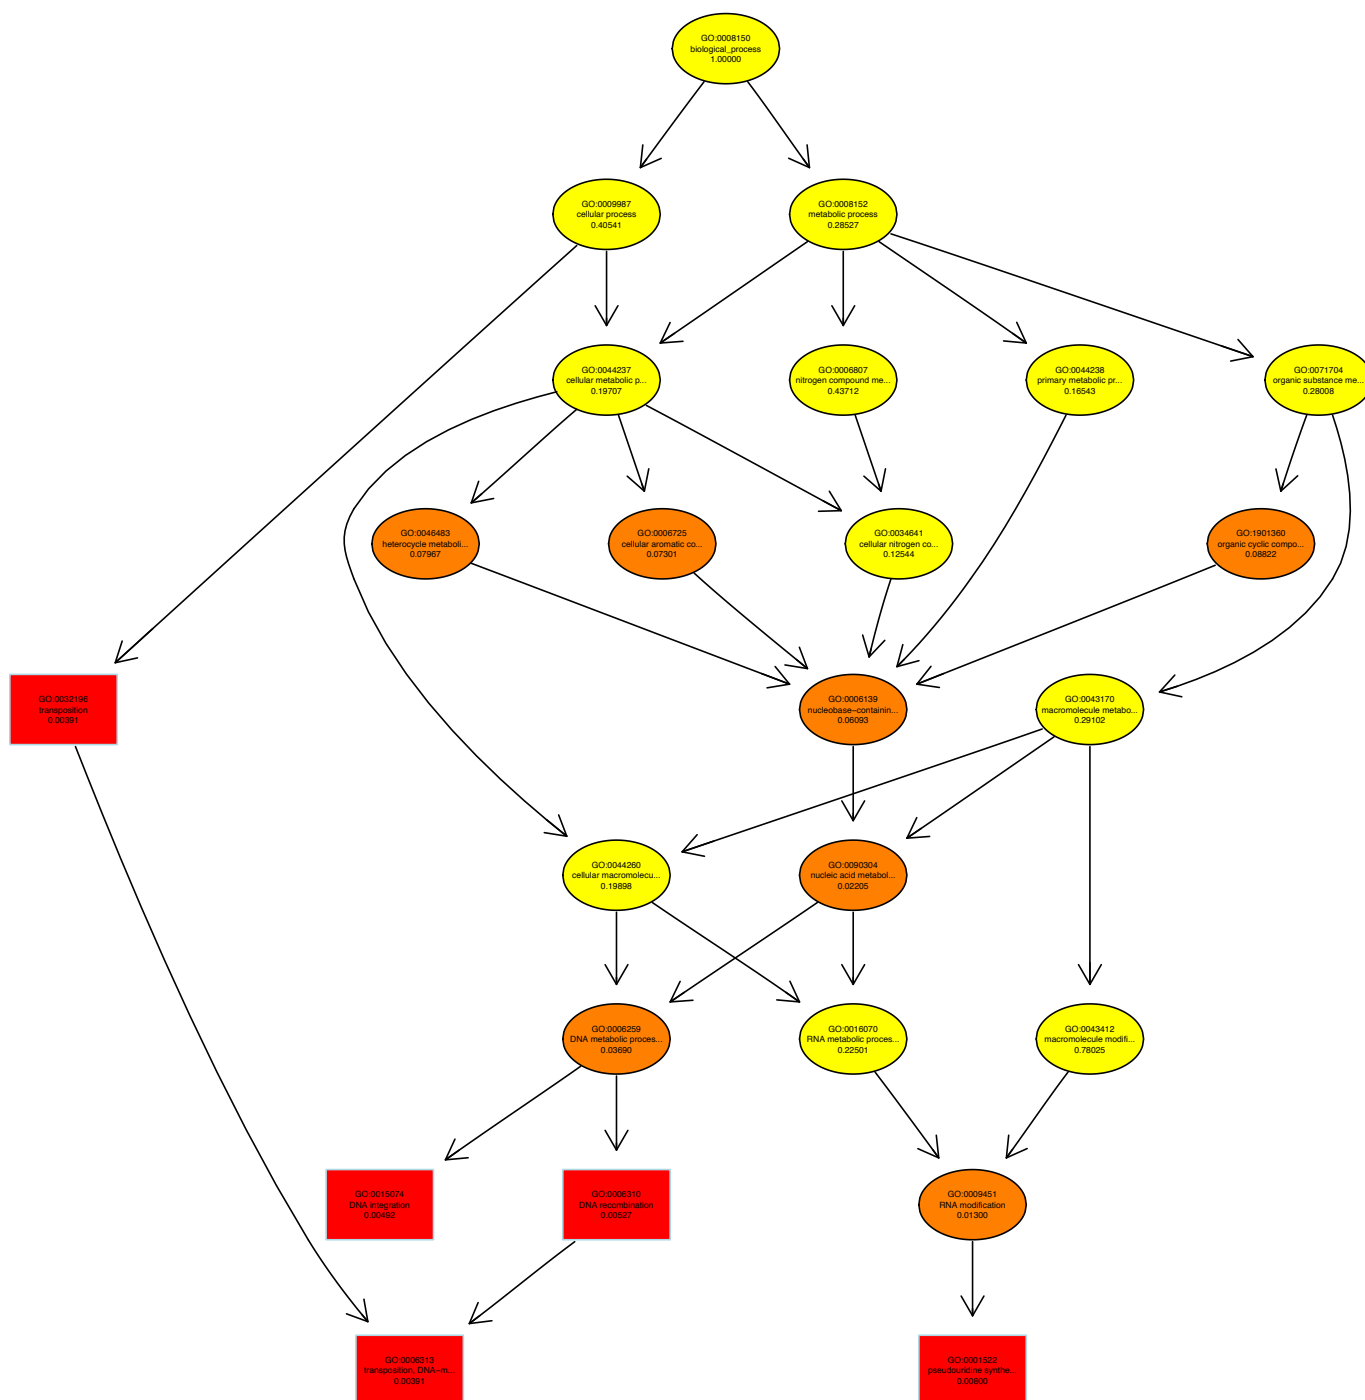

**Figure S4** Subgraph induced by the enriched GO terms of biological processes found among the differentially expressed superTranscripts of *B. terrestris* ( $p < 0.01$ ) when compared to the entire transcriptome. GO terms identified by the classic algorithm for scoring GO terms for enrichment. Box colours represent the relative significance, ranging from dark red (most significant) to light yellow (least significant). Black arrows indicate *is-a* (i.e., is a subtype of) relationships.



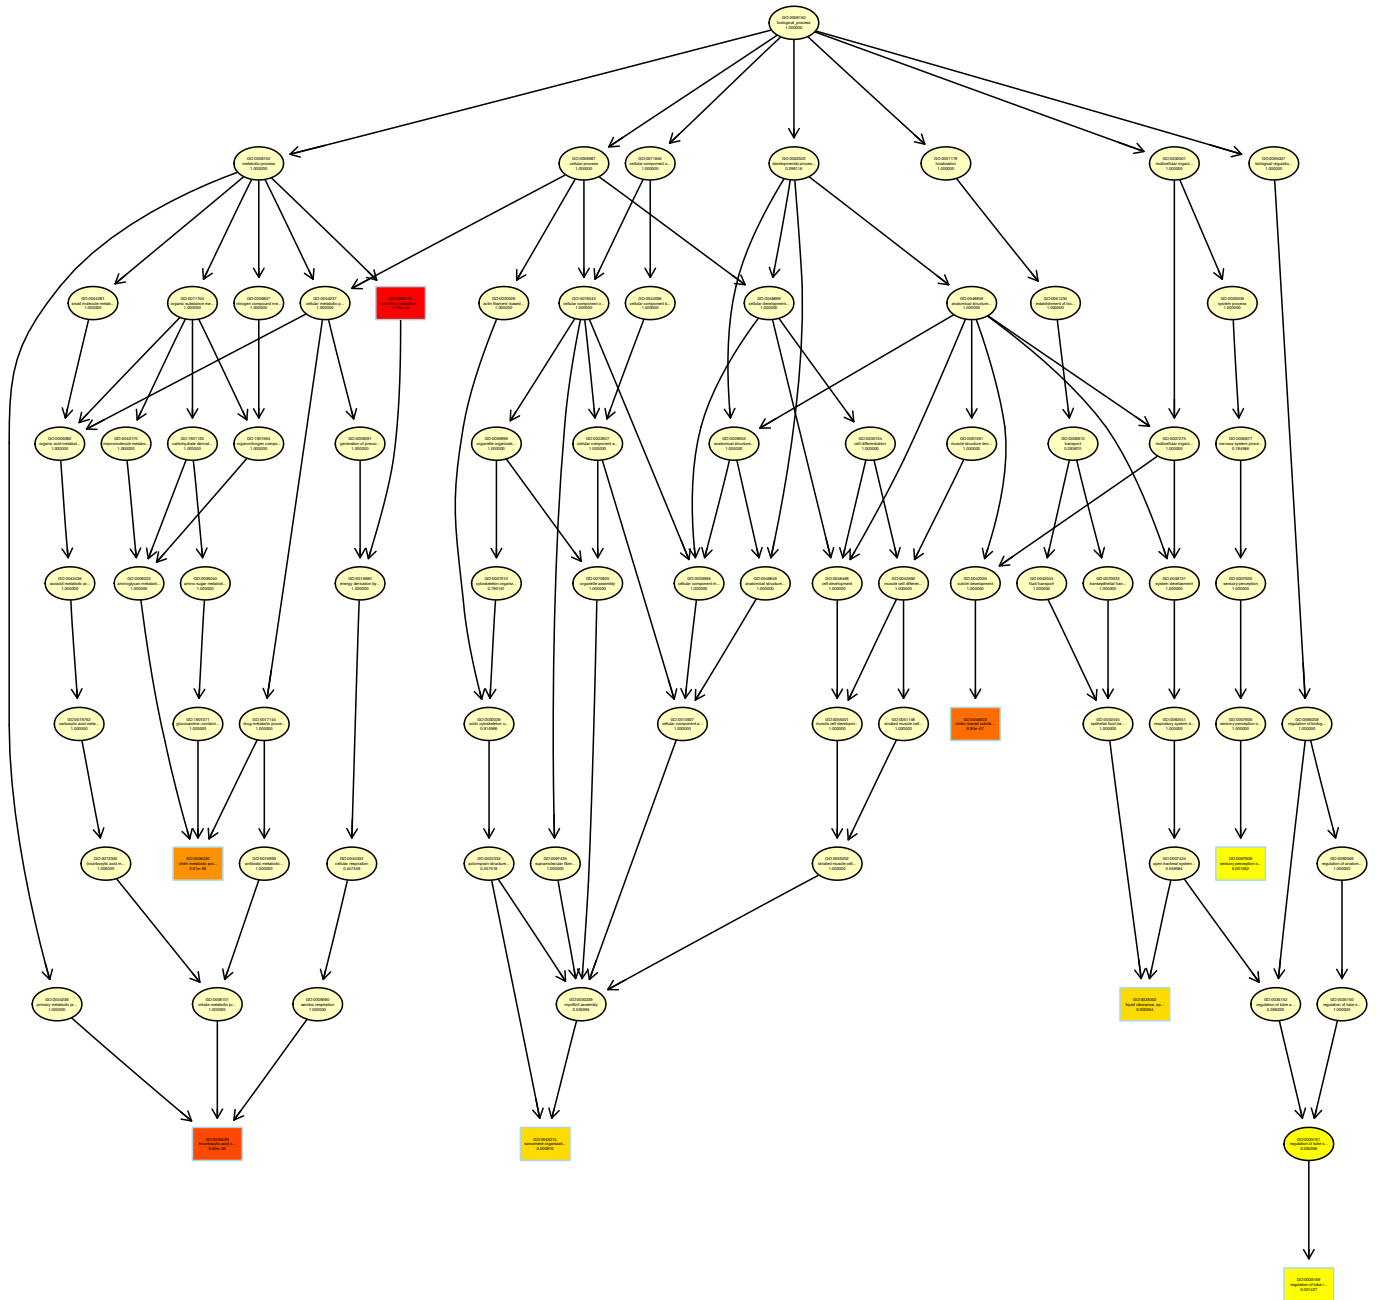

**Figure S6** Subgraph induced by the top eight enriched GO terms of biological processes found among the differentially expressed genes in the head of *A. mellifera* ( $p < 0.01$ ) when compared to the expressed transcriptome (as defined by <sup>1</sup>). Top 8 GO terms identified by the weighted01 algorithm for scoring GO terms for enrichment. Box colours represent the relative significance, ranging from dark red (most significant) to light yellow (least significant). Black arrows indicate *is-a* (i.e., is a subtype of) relationships. The subgraph induced by all enriched GO terms is available at [https://github.com/nat2bee/Foragers\\_vs\\_Nurses](https://github.com/nat2bee/Foragers_vs_Nurses).

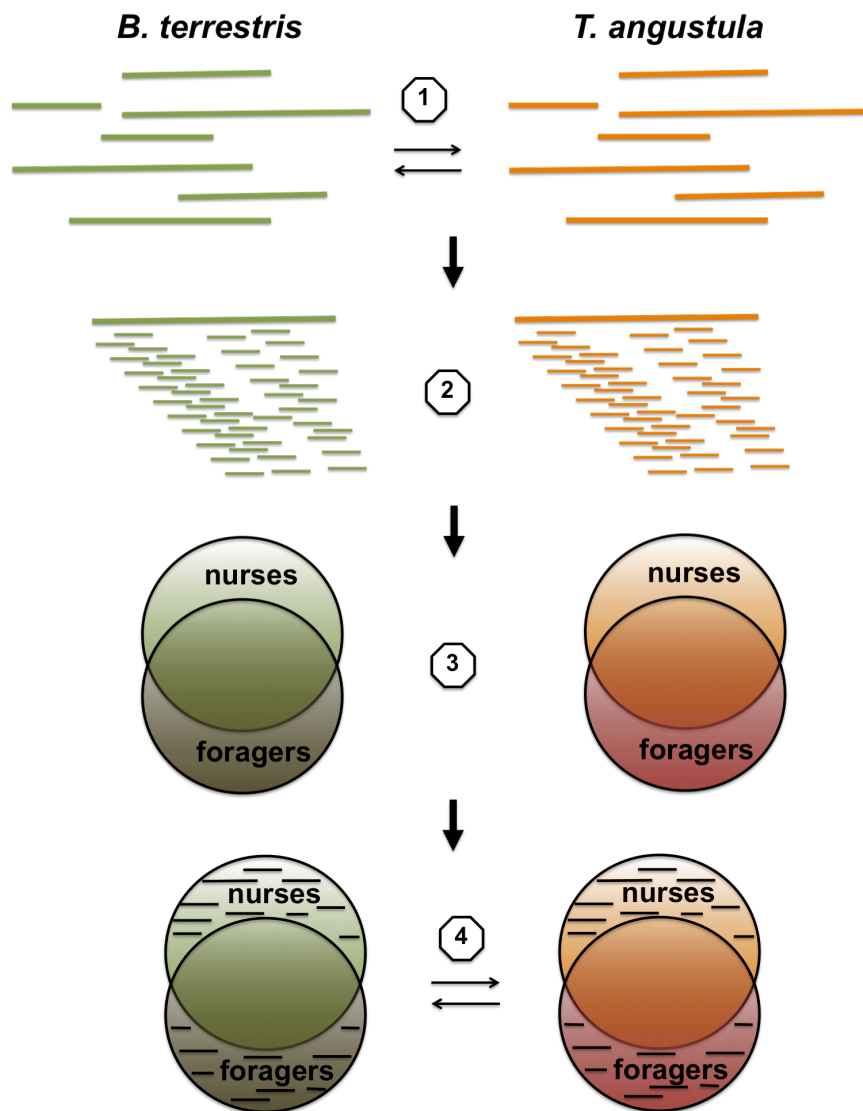

**Figure S7.** Workflow of analysis comparing expression of nurses and foragers of *T. angustula* and *B. terrestris*. **1** – Transcriptome assembly. **2** - Realignment of the cleaned reads to the assembled superTranscripts for expression count. **3** - Differential expression analyses between the distinct worker subcastes within species. **4** - Comparison of the results between species.

1. Warner, M. R., Qiu, L., Holmes, M. J., Mikheyev, A. S. & Linksvayer, T. A. Convergent eusocial evolution is based on a shared reproductive groundplan plus lineage-specific plastic genes. *Nat. Commun.* **10**, 1–11 (2019).
